# Supplementary material for: Femtosecond laser-induced spin dynamics in single-layer graphene/CoFeB thin films
Source: Royal Society of Chemistry journal article supplement (doi:10.1039/d1nr03397b), 2021-01-01
Supplement: d1nr03397b6.pdf [file d1nr03397b6.pdf]

## 1 Electronic Supplementary Material

### 2 Femtosecond Laser Induced Spin Dynamics in Single 3 Layer Graphene/CoFeB Thin Films

4 *Surya Narayan Panda, Sudip Majumder, Samiran Choudhury, Arpan Bhattacharya, Sumona*  
5 *Sinha, Anjan Barman\**

#### 6 **S-I. Micro-Raman Spectroscopy Analysis:**

7 The micro-Raman scattering experiment (wavelength = 532 nm, microscope objective: 100X,  
8 grating: 600 g/mm, N.A. = 0.9 and spot diameter  $\approx 0.7 \mu\text{m}$ ) was carried out using a micro-Raman  
9 setup comprising a spectrometer (model Lab Ram HR Evolution, Horiba France SAS) and a  
10 thermoelectrically-cooled charge-coupled device (CCD) detector with 1024 $\times$ 256 pixel resolution  
11 to characterize the graphene layer, and underpin the effects of CoFeB deposition on graphene. The  
12 main features in the Raman spectra of carbon-based materials are the G and D peaks observed at  
13 1586.8 and 1341  $\text{cm}^{-1}$ , respectively. The G peak corresponds to the optical  $E_{2g}$  phonons at the  
14 Brillouin zone center, whereas the D peak is caused by transverse optical phonons near the K point  
15 of hexagonal ring and requires structural defects for its activation via an intervalley double-  
16 resonance.<sup>1</sup> It is present in defective carbon materials and its intensity ( $I_D$ ) is proportional to the  
17 defect concentration in graphene.<sup>1,2</sup> Higher  $I_D$  signifies that the  $sp^2$  bonds in graphene are broken,  
18 which, in turn, means that there are more  $sp^3$  bonds and transformation from  $sp^2$  dominance to  $sp^3$   
19 dominance in the material. Its overtone, the 2D peak, appears at around 2678.9  $\text{cm}^{-1}$ . There is also  
20 a peak at around 1623  $\text{cm}^{-1}$ , called D'-peak, which occurs via an intravalley double-resonance  
21 process in the presence of defects. A combination mode (D + D') appears at around 2939  $\text{cm}^{-1}$   
22 which also requires defects for its activation. We notice that  $I_D$  decreases by a factor of 14 when

23 CoFeB thickness increases from 1.5 to 6.0 nm (as shown in Fig. S1(a) and Fig. S1(b)), which  
24 signifies decrease in defect concentration in the graphene with an increase in CoFeB layer  
25 thickness. Intensities of D-peak and G-peak ( $I_G$ ) decrease with an increase in CoFeB layer  
26 thickness despite maintaining identical external conditions (as shown in Fig. S1(b)). However, rate  
27 of decrease of  $I_G$  is much smaller in comparison to that of  $I_D$  which results in a decrease in spectral  
28 weight ratio ( $I_D/I_G$  ratio) with an increase in CoFeB layer thickness (as shown in Fig. S1(c)).  
29 Furthermore, perfect Lorentzian shaped 2D peak (which is shown in inset of Fig. S1(b)) proves  
30 single layer nature of graphene. The average crystallite size ( $L_a$ ), which is a measure of the average  
31 distance between two adjacent defects, can be calculated using the relation:<sup>5</sup>

$$32 \quad L_a = (2.4 \times 10^{-10}) \lambda^4 (I_D/I_G)^{-1} \quad (S1)$$

33 Here  $I_G$  is the G-peak intensity and  $\lambda$  is the excitation wavelength (532 nm). Fig. S1(d) shows  
34 there is an increase of  $L_a$  with the CoFeB thickness which indicate a decrease in defect density at  
35 higher CoFeB thicknesses.<sup>5,6</sup> This decrease in defect density with an increase in CoFeB thickness  
36 also indicates a decrease in the defect-induced extrinsic effects with CoFeB thickness.

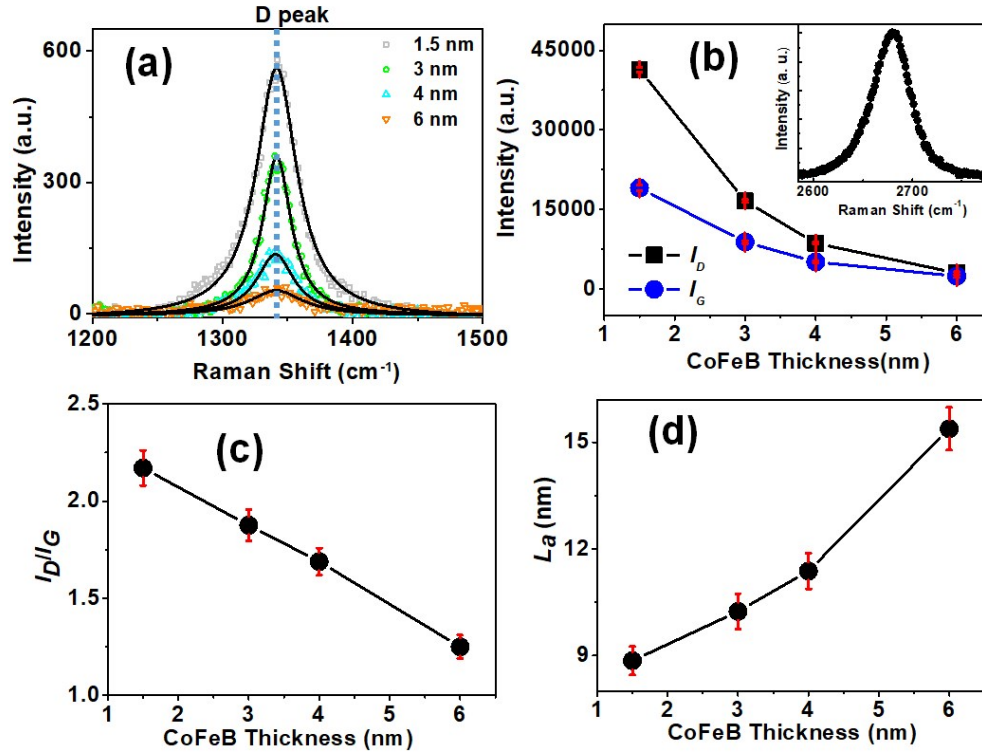

37

38 **Fig. S1.** (a) Variation of D peak of Raman spectra with CoFeB thickness. Scattered symbols are  
 39 the experimental data points and solid lines are Lorentzian fits. (b) Variation of D peak intensity  
 40 ( $I_D$ ) and G peak intensity ( $I_G$ ) with CoFeB thickness. Inset shows perfect Lorentzian shaped 2D  
 41 peak for Raman spectra of SLG. (c) Variation of  $I_D/I_G$  ratio with CoFeB thickness. (d) Variation  
 42 of average crystallite size ( $L_a$ ) with CoFeB thickness.

43

#### 44 **S-II. Interfacial Roughness Obtained from AFM and XRR Measurements**

45 **AFM Measurement:** We have also measured the surface topography of Sub/SLG/Co<sub>20</sub>Fe<sub>60</sub>B<sub>20</sub>  
 46 (d)/SiO<sub>2</sub> (2 nm) thin films using atomic force microscopy (AFM) in dynamic tapping mode by  
 47 taking scans over 2  $\mu\text{m} \times 2 \mu\text{m}$  area. Due to the small thicknesses of our thin films, the interfacial  
 48 roughness must exhibit its imprint on the topographical roughness. We have analyzed the AFM  
 49 images using WSxM software.<sup>7</sup> Also, variation in surface roughness very small when measured at  
 50 different regions of the same sample. AFM images obtained for different CoFeB thicknesses in  
 51 the presence of SLG is shown in Fig. S2(a). Average topographical roughness values obtained

52 from AFM measurement is plotted in Fig. S2(b). Average topographical roughness obtained from  
 53 AFM is found to monotonically decrease with CoFeB thickness in the presence of SLG.  
 54 **X-ray Reflectivity Measurement:** Grazing-incidence X-ray reflectivity (XRR) is a powerful  
 55 technique for non-destructive probing of the structure of surface and interfaces. X-ray specular  
 56 reflectivity measurements provide information about the interfacial roughness, thickness, and  
 57 average electron density of different sub-layers of a thin film. We measured the XRR-spectra of  
 58 Sub/SLG/Co<sub>20</sub>Fe<sub>60</sub>B<sub>20</sub> (*d*)/SiO<sub>2</sub> (2 nm) thin films using 8 KeV X-ray source and analyzed the  
 59 spectra using Parratt's formalism. Average surface roughness obtained from the fit is plotted in  
 60 Fig. S2(b) which shows that for lower CoFeB thickness (< 4 nm) roughness is higher as opposed  
 61 to higher CoFeB thickness ( $\geq 4$  nm). However, the roughness values obtained from AFM  
 62 measurements are slightly lower than those obtained from XRR measurements. Electron densities  
 63 of CoFeB, SLG and SiO<sub>2</sub> are found to be  $15.0 \times 10^{-5}$ ,  $1.5 \times 10^{-5}$  and,  $2.0 \times 10^{-5} \text{ \AA}^{-2}$ , respectively,  
 64 independent of CoFeB layer thickness (Shown in Fig. S2(c)).

65

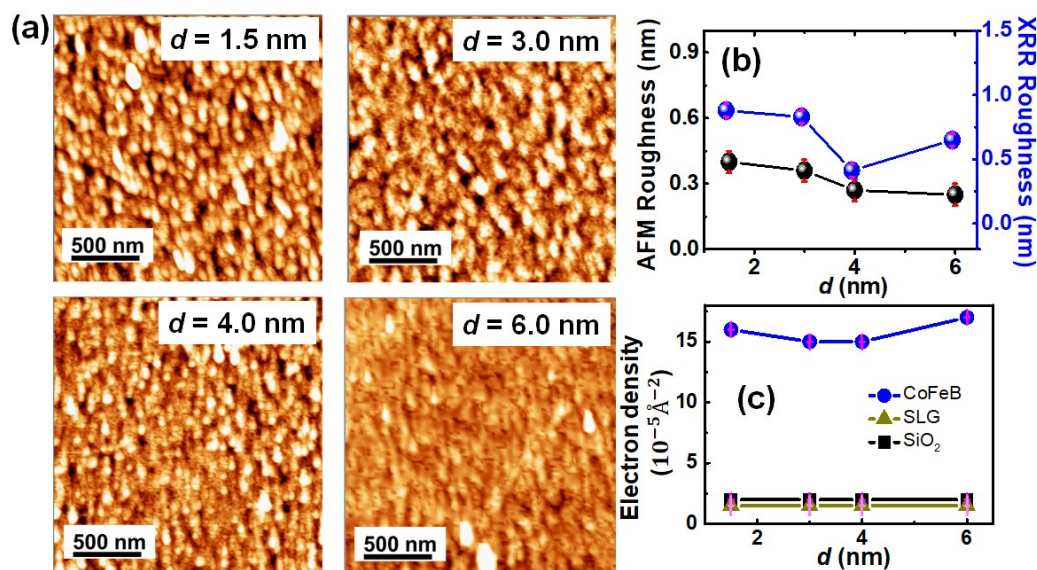

66

67

68 **Fig. S2.** (a) AFM images for Sub/SLG/CoFeB(*d*)/SiO<sub>2</sub>(2 nm) samples. (b) Comparison between  
69 average roughness vs. CoFeB thickness obtained from AFM and XRR measurements. (c)  
70 Variation of electron density of SLG, CoFeB and SiO<sub>2</sub> with CoFeB thickness measured using XRR  
71 measurement.

72

### 73 **S-III. Ultrafast Demagnetization and Its Correlation with Gilbert Damping:**

74 Intercorrelation between ultrafast demagnetization time ( $\tau_m$ ) and Gilbert damping parameter( $\alpha$ ) is  
75 of significant interest in recent times, as both share similar physical processes. Initially, based on  
76 the local phonon-mediated Elliott-Yafet scattering mechanism an inverse relationship between  $\tau_m$   
77 and  $\alpha$  was predicted by B. Koopmans. *et al.*<sup>8</sup> Later experimental studies on rare-earth-doped  
78 Permalloy<sup>9</sup> and TbFeCo<sup>10</sup> found few drawbacks in this prediction due to the presence 4f bands  
79 which results in opening of an extra dissipation channel due to repopulation of states and distortion  
80 of the lattice. Following this, Fahnle et al.<sup>11</sup> showed that  $\alpha$  can either be proportional or inversely  
81 proportional to  $\tau_m$  depending upon the major microscopic contribution to it. When the damping is  
82 dominated by intra-band conductivity-like contribution there is a linear relationship between  $\tau_m$   
83 and  $\alpha$ , whereas the inter-band resistivity-like contribution leads to an inverse relation. However,  
84 this model is proved to be effective only for the simple ferromagnetic system like Fe, Ni or Co  
85 without considering the effect of spin current transport, interfacial band hybridization and spin-  
86 orbit coupling. Recently an effective method is proposed and experimentally validated for bilayers  
87 and more complicated systems for unifying the  $\tau_m$  and  $\alpha$  to distinguish the dominant mechanism  
88 for ultrafast demagnetization.<sup>12,13</sup> According to this, a proportional relation between the  $\tau_m$  and  $\alpha$   
89 indicates that the local spin-flip scattering mechanism dominates the ultrafast demagnetization  
90 process. However, an inverse dependence of  $\tau_m$  on  $\alpha$  indicates that the nonlocal spin transport  
91 mechanism dominates the ultrafast demagnetization process. In the presence of effects like spin

92 pumping in a system, interfacial spin accumulation and its dissipation by spin current transport  
 93 can open an additional channel to decrease the  $\tau_m$  and enhance the  $\alpha$ .

94 **S-IV. Transient Reflectivity and Kerr Rotation:**

95 We have examined whether the Kerr rotation corresponding to the demagnetization curves  
 96 originates primarily from magnetic effects or any optical effects caused by the femtosecond laser  
 97 irradiation make significant contribution in it. Here, we have presented the temporal variation of  
 98 the normalized reflectivity and Kerr rotation in Fig. S3(a) and Fig. S3(b), respectively, for  
 99 Sub/SLG/ CoFeB (3 nm)/ SiO<sub>2</sub> (2 nm). Fig. S3(c) shows the relative variation of the time-resolved  
 100 reflectivity and Kerr rotation with CoFeB thickness which clearly shows that the reflectivity signal  
 101 is much smaller than the Kerr rotation, implying negligible non-magnetic contributions in the Kerr  
 102 rotation data in general.

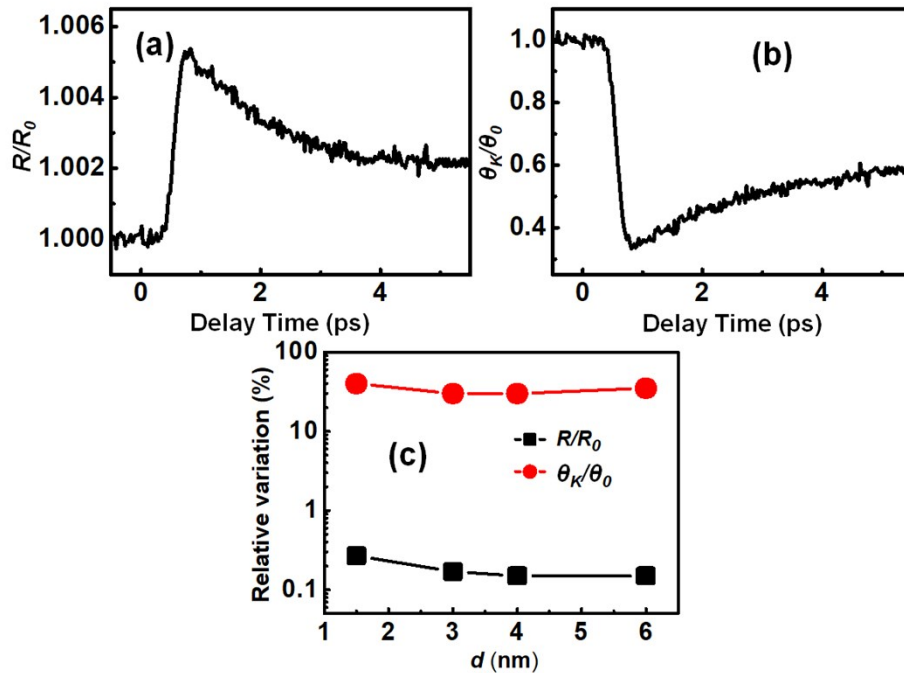

103 **Fig. S3.** (a) Transient reflectivity for Sub/SLG/CoFeB(3 nm)/SiO<sub>2</sub>(2 nm) at pump fluence of 5  
 104 mJ/cm<sup>2</sup> normalized *w.r.t.* the corresponding negative delay value. (b) Transient Kerr rotation for  
 105 Sub/SLG/CoFeB (3 nm)/SiO<sub>2</sub>(2 nm) normalized *w.r.t.* the corresponding negative delay value. (c)  
 106 Sub/SLG/CoFeB (3 nm)/SiO<sub>2</sub>(2 nm) normalized *w.r.t.* the corresponding negative delay value.

107 Relative variation of the peak values of transient Kerr rotation and reflectivity for varying CoFeB  
108 thickness.

109

## 110 **S-V. Bias Field Dependent Precession Frequency and Damping**

111 The variation of precessional dynamics with bias magnetic field ( $H$ ) at a pump fluence of 5 mJ/cm<sup>2</sup>  
112 for SLG/CoFeB(3 nm)/SiO<sub>2</sub>(2 nm) is shown in Fig. S4(a). The precessional oscillation is fitted  
113 with damped sinusoidal function of eq 4 of the article for extracting the relaxation time ( $\tau$ ) and  
114 precessional frequency( $f$ ). The effective saturation magnetization ( $M_{eff}$ ) of the samples is obtained  
115 by fitting  $f$  vs.  $H$  data with the Kittel formula (eq 5) (see Fig. S4(b)). We have extracted the  
116 interfacial magnetic anisotropy energy density ( $K_s$ ) and saturation magnetization( $M_s$ ) which is an  
117 indicator of the strength of the interfacial spin-orbit coupling (ISOC) by fitting the CoFeB  
118 thickness( $d$ )-dependent  $M_{eff}$ (see Fig. S4(c)) with the formula:<sup>14</sup>

$$119 \quad 4\pi M_{eff} = 4\pi M_s - \frac{2K_s}{M_s d} \quad (S2)$$

120 From the fit, we have extracted the values of interfacial magnetic anisotropy energy density ( $K_s$ ),  
121 which is an indicator of the strength of the interfacial spin-orbit coupling (ISOC), to be  $0.655 \pm$   
122  $0.02$  erg/cm<sup>2</sup> in presence and absence of the SLG underlayer. However, saturation magnetization  
123 ( $M_s$ ) decreases from  $1327 \pm 46$  emu/cc in absence of SLG to  $1220 \pm 34$  emu/cc in presence of SLG  
124 underlayer. This decrease in  $M_s$  can be attributed to the charge transfer from CoFeB to SLG and  
125 induced hybridization between graphene  $\pi$ -band and d-band of Co/Fe. After finding  $\tau$  and  $M_{eff}$  from  
126 the experiment, we have extracted the Gilbert damping ( $\alpha$ ) by using eq 6 of the article. Variation  
127 of  $\alpha$  with the bias magnetic field is plotted in Fig. S4(d). The  $\alpha$  reduces monotonically with the  
128 increase in bias magnetic field and saturates at higher fields. For extracting both intrinsic and  
129 extrinsic contributions it can be fitted with the equation below:<sup>13</sup>

130 
$$\alpha = \alpha_0 + \alpha_{ext} = \alpha_0 + \alpha_1 e^{-H/H_0} \quad (S3)$$

131 Here  $\alpha_0$  and  $\alpha_1 e^{-H/H_0}$  are intrinsic and extrinsic contribution to the damping. The literature shows  
 132 that the Gilbert damping due to two-magnon scattering increases with applied magnetic field  
 133 because of the increased degeneracy of spin waves. However, in our studied system we have  
 134 observed nearly constant Gilbert damping at higher applied magnetic fields, indicating minor  
 135 contributions from the two-magnon scattering and surface inhomogeneity to precessional  
 136 oscillation. All the thickness dependent studies have been performed at a high bias magnetic field  
 137 of 3.59 kOe to ensure negligible extrinsic contribution for all studied samples.

138

139

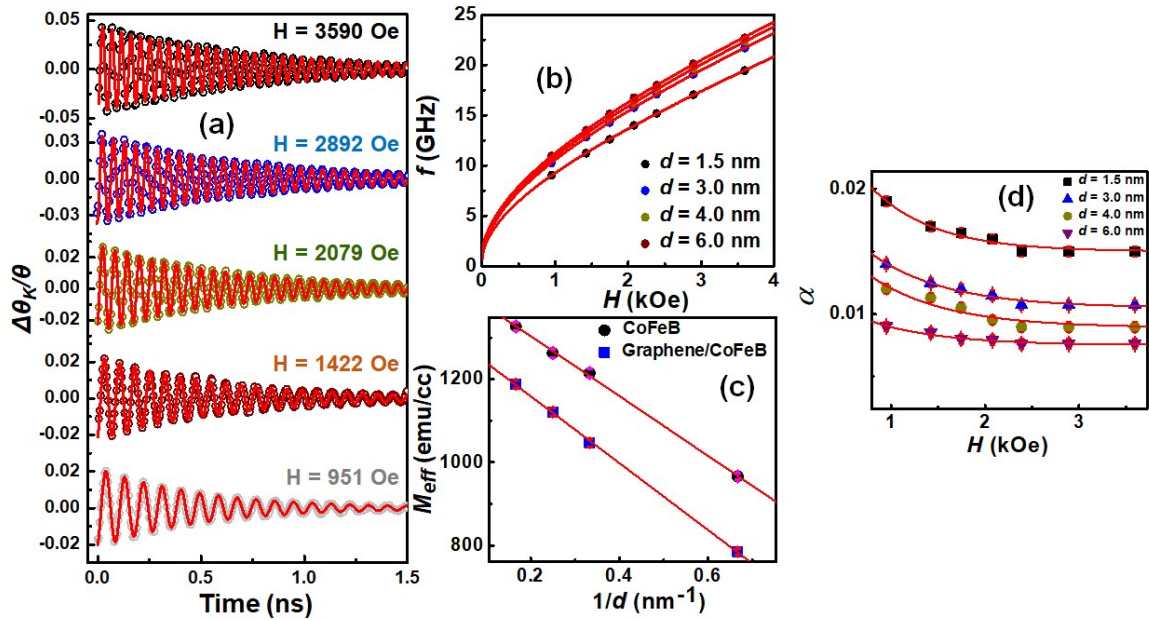

140

141

142 **Fig. S4.** (a) Bias magnetic field dependent time-resolved Kerr rotation data for Sub/SLG/CoFeB  
 143 (3 nm)/SiO<sub>2</sub> (2 nm) showing precessional oscillations. Symbols are experimental data points and  
 144 solid red lines are fit using eq 4 of the article. (b) Variation of  $f$  with  $H$  for  
 145 Sub/SLG/CoFeB( $d$ )/SiO<sub>2</sub>(2 nm) samples. Symbols are experimental data points and solid red lines  
 146 are fits using eq 5 of the article. (c) Variation of  $M_{eff}$  with  $1/d$ . Symbols are experimental data



147 points and solid red lines are fits using eq S2. (d) Variation of  $\alpha$  with  $H$ . Symbols are experimental  
148 data points and solid red lines are fits using eq S3.

149

## 150 **References:**

151 [1] A.C. Ferrari, and D.M. Basko, *Nat. Nanotechnol.*, 2013, **8**, 235-246.

152 [2] P. Venezuela, M. Lazzeri, and F. Mauri, *Phys. Rev. B*, 2011, **84**, 035433.

153 [3] A. C. Ferrari, *Solid State Commun.* 2007, **143**, 47.

154 [4] T. Mashoff, D. Convertino, V. Miseikis, C. Coletti, V. Piazza, V. Tozzini, F. Beltram, and S.  
155 Heun, *Appl. Phys. Lett.*, 2015, **106**, 083901.

156 [5] L. G. Cançado, K. Takai, T. Enoki, M. Endo, Y. A. Kim, H. Mizusaki, A. Jorio, L. N.  
157 Coelho, R. Magalhães-Paniago, and M.A. Pimenta, *Appl. Phys. Lett.*, 2006, **88**, 163106.

158 [6] A. K. Chaurasiya, A. Kumar, R. Gupta, S. Chaudhary, P. K. Muduli, and A. Barman, *Phys. Rev.*  
159 *B*, 2019, **99**, 035402.

160 [7] I. Horcas, R. Fernández, J. M. Gómez-Rodríguez, J. Colchero, J. Gómez-Herrero, and A. M.  
161 Baro, *Rev. Sci. Instrum.* 2007, **78**, 013705.

162 [8] B. Koopmans, J. J. M. Ruigrok, F. D. Longa, and W. J. M. de Jonge, *Phys. Rev. Lett.* 2005,  
163 **95**, 267207.

164 [9] J. Walowski, G. Müller, M. Djordjevic, M. Münzenberg, M. Kläui, C. A. F. Vaz, and J. A.  
165 C. Bland, *Phys. Rev. Lett.* 2008, **101**, 237401.

166 [10] Y. Ren, Y. L. Zuo, M. S. Si, Z. Z. Zhang, Q. Y. Jin, and S. M. Zhou, *IEEE Trans. Magn.*  
167 2013, **49**, 3159-3162.

168 [11] M. Fähnle, J. Seib, and C. Illg, *Phys. Rev. B*, 2010, **82**, 144405.

169 [12] W. Zhang, W. He, X. Q. Zhang, Z. H. Cheng, J. Teng, and M. Fähnle, *Phys. Rev. B*, 2017,  
170 **96**, 220415.

171 [13] W. Zhang, Q. Liu, Z. Yuan, K. Xia, W. He, Q. F. Zhan, X. Q. Zhang, and Z. H. Cheng,  
172 *Phys. Rev. B*, 2019, **100**, 104412.

173 [14] G. Wu, Y. Ren, X. He, Y. Zhang, H. Xue, Z. Ji, Q. Y. Jin, and Z. Zhang, *Phys. Rev. Appl.*,  
174 2020, **13**, 024027.

175

176
