# Supplementary figures and images for: Femtosecond laser-induced spin dynamics in single-layer graphene/CoFeB thin films
Source: Royal Society of Chemistry journal article supplement (doi:10.1039/d1nr03397b), 2021-01-01

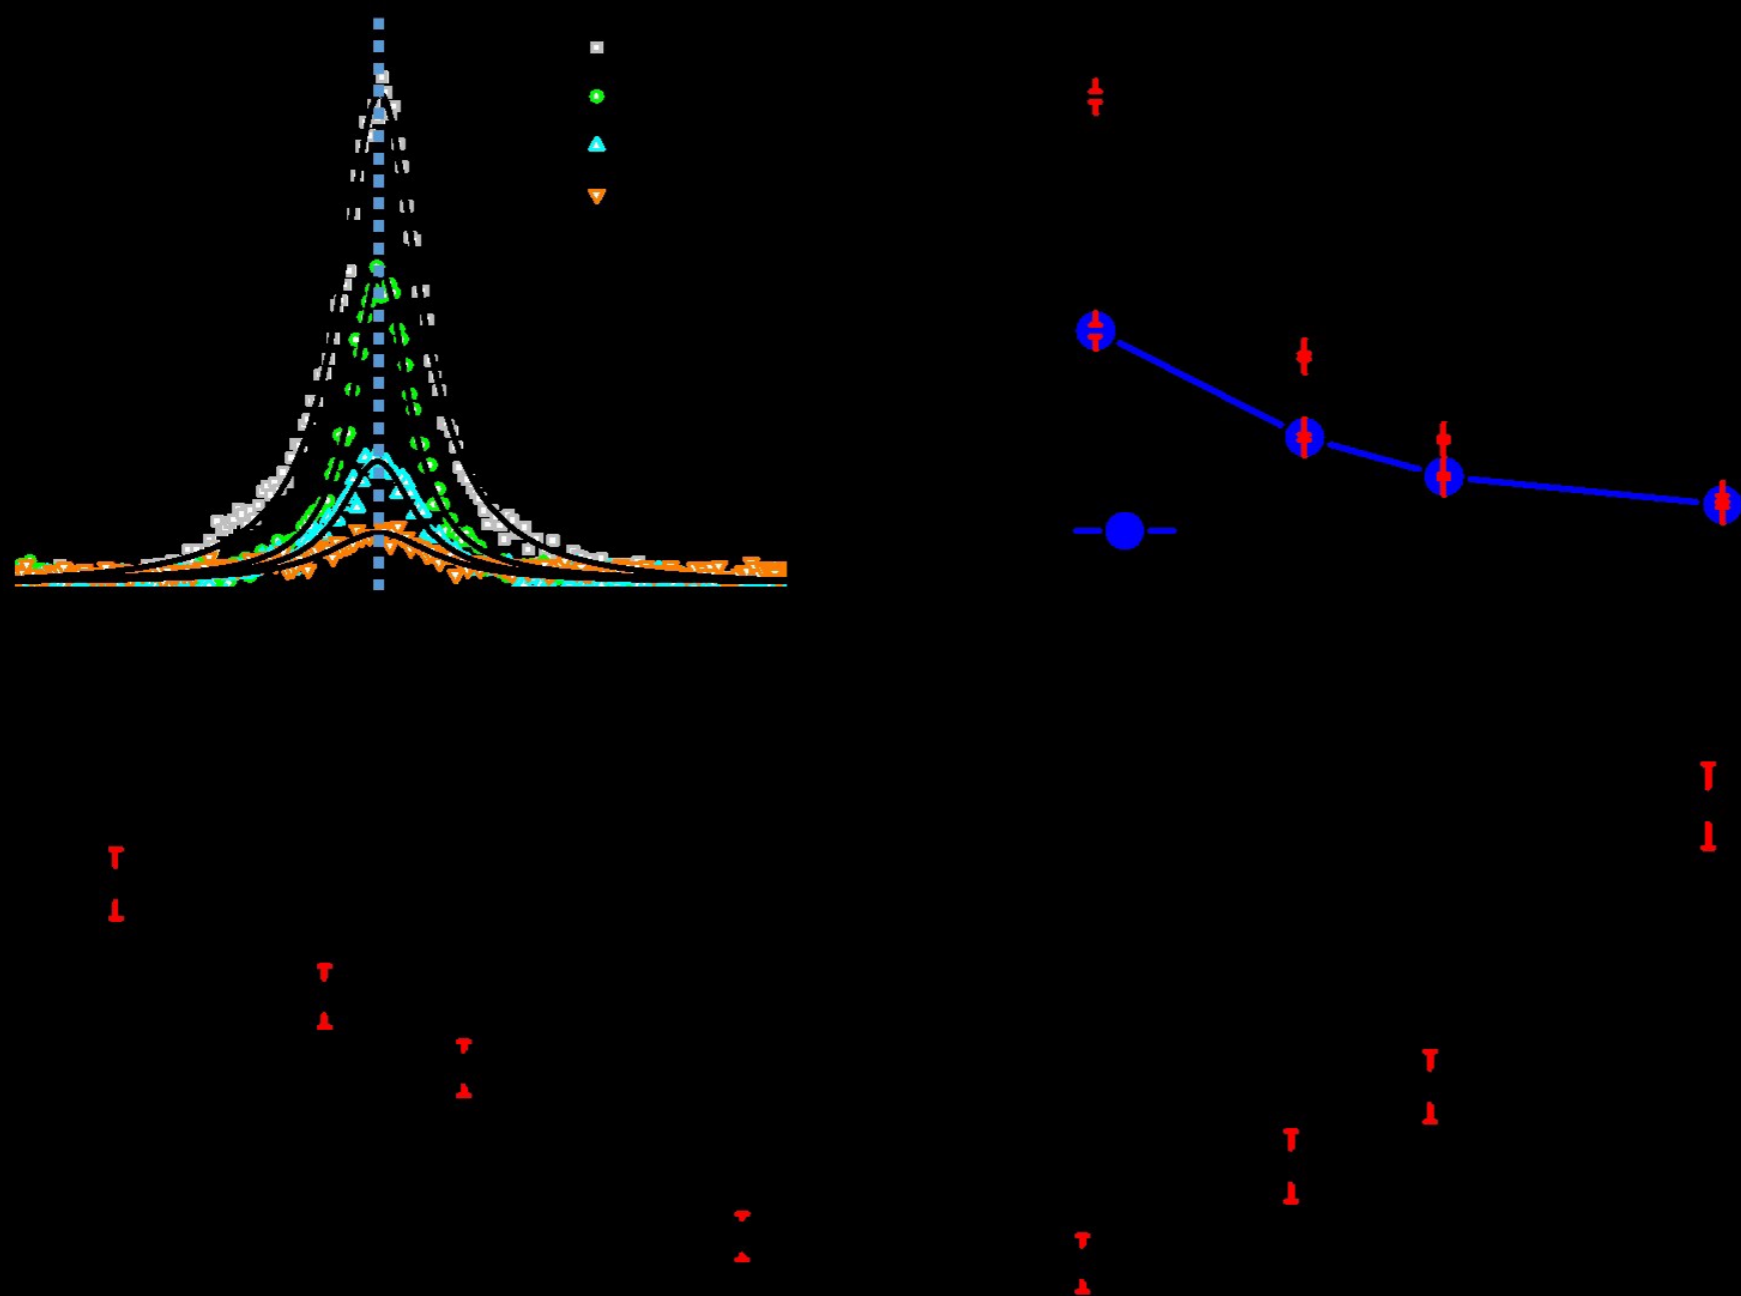

Supplement: d1nr03397b2.pdf [file d1nr03397b2.pdf]

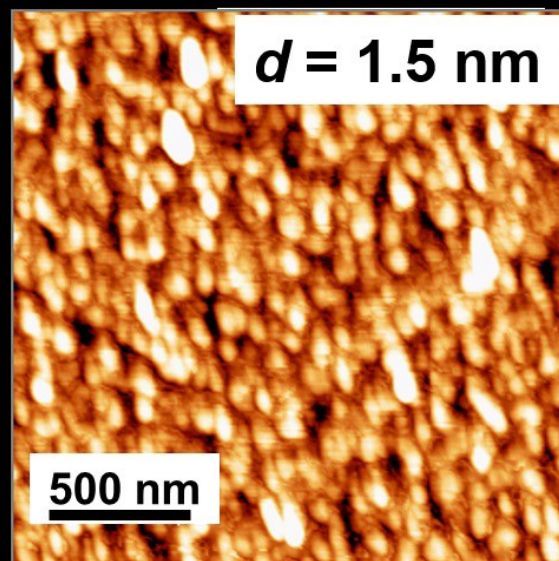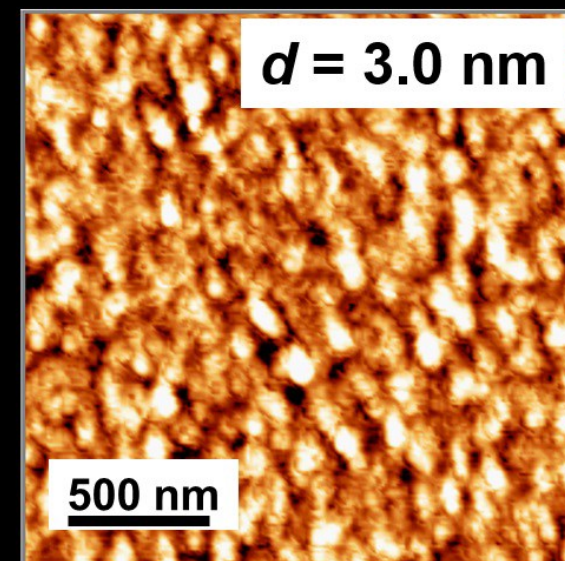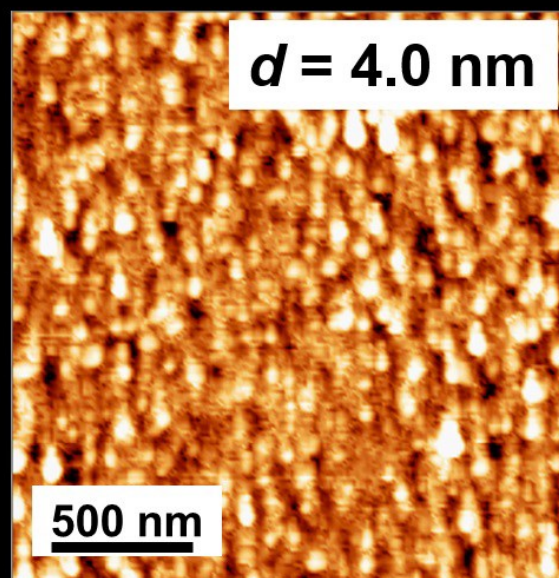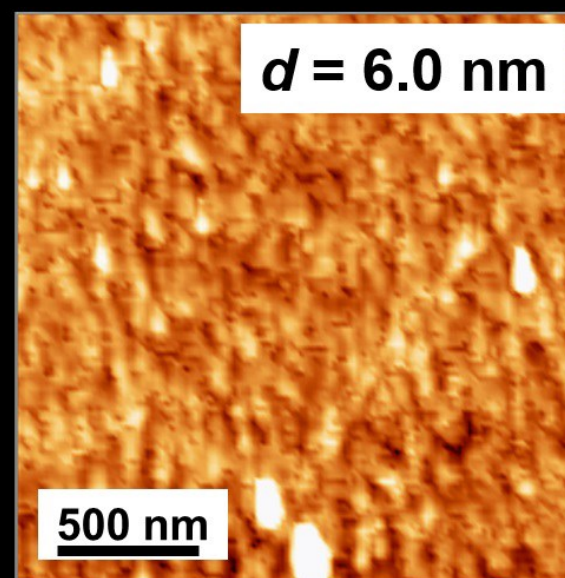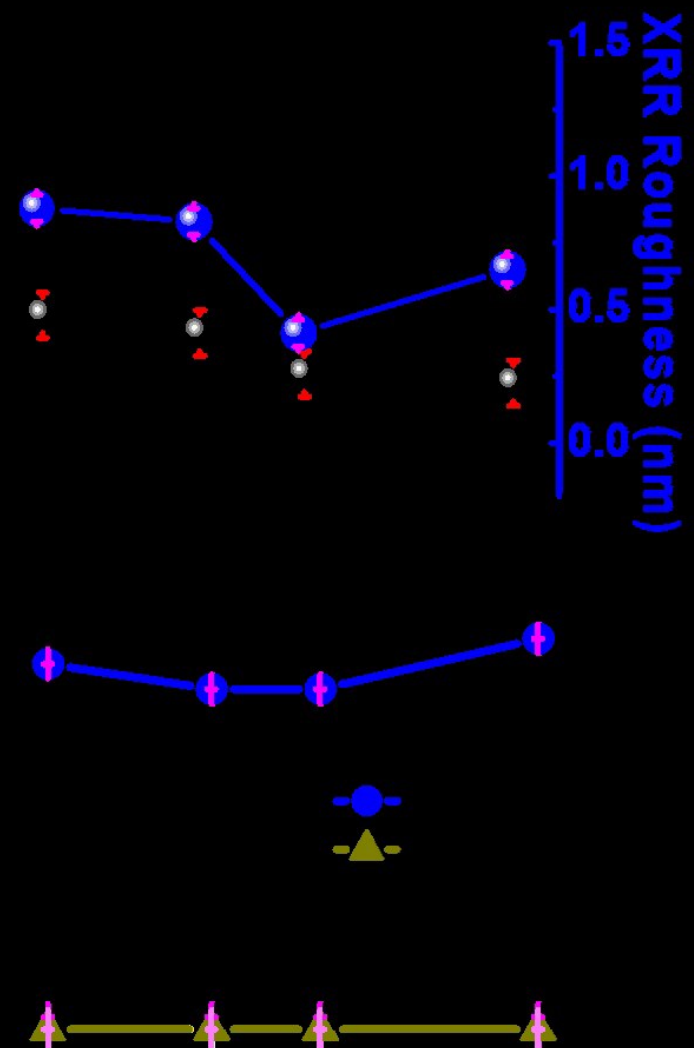

Supplement: d1nr03397b3.pdf [file d1nr03397b3.pdf]

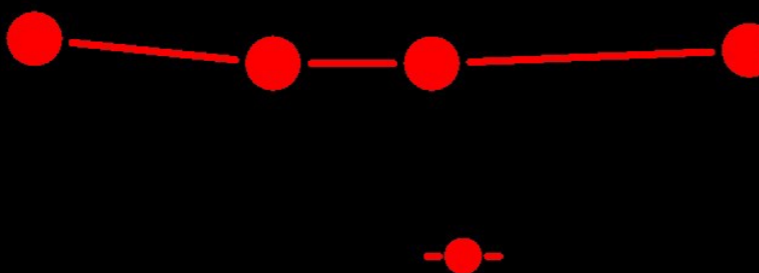

Supplement: d1nr03397b4.pdf [file d1nr03397b4.pdf]

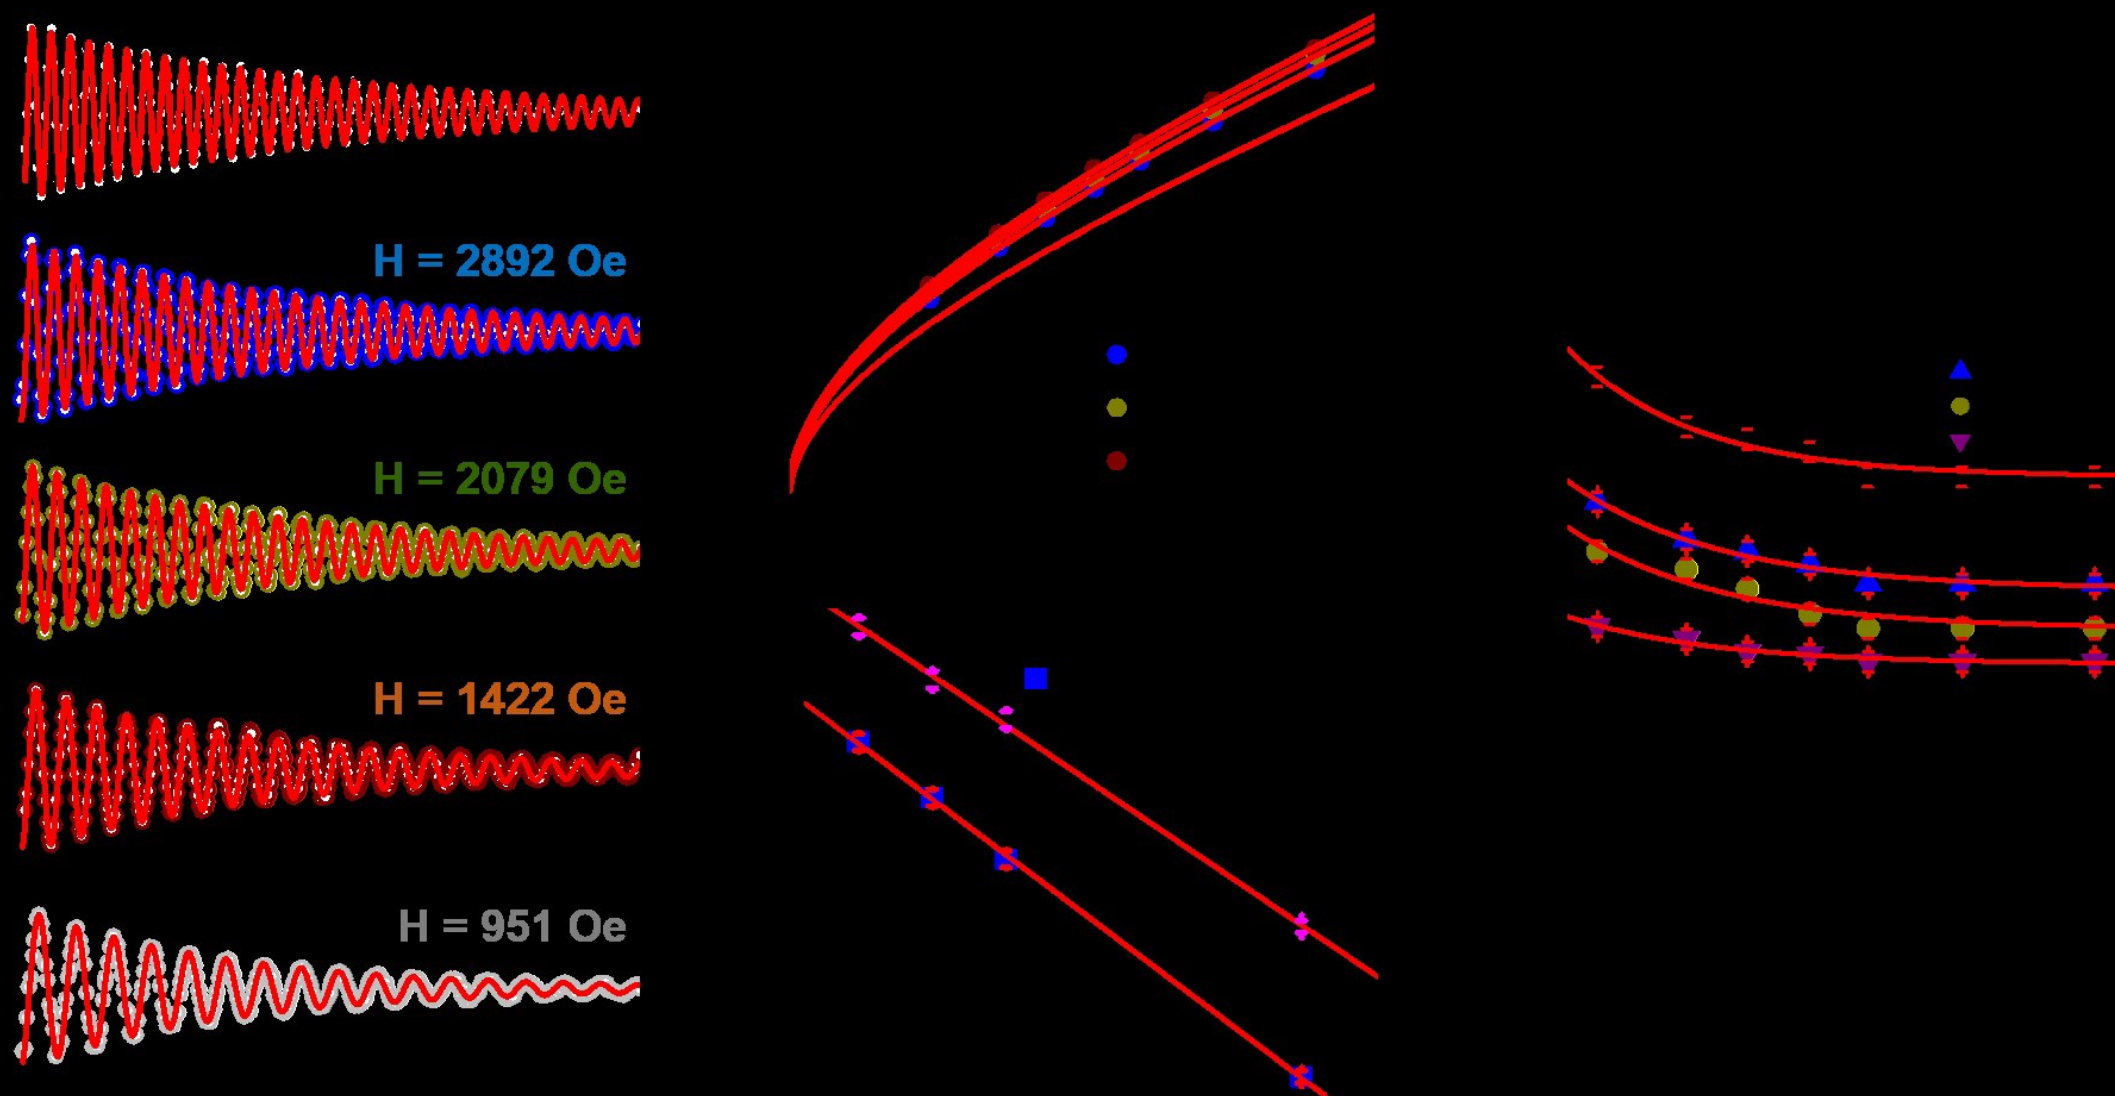

Supplement: d1nr03397b5.pdf [file d1nr03397b5.pdf]
